# Supplementary material for: Mother–Fetus Immune Cross-Talk Coordinates “Extrinsic”/“Intrinsic” Embryo Gene Expression Noise and Growth Stability
Source: MDPI journal article supplement (doi:10.3390/ijms232012467), 2022-10-18
Supplement: s1 [file s1]

## **Supplementary materials**

### **Mother–fetus immune cross-talk coordinates “extrinsic”/”intrinsic” embryo gene expression noise and growth stability**

Tatyana Ivanovna Babochkina<sup>3</sup>; Ludmila Alekseevna Gerlinskaya<sup>3</sup>; Margarita Vladimirovna Anisimova<sup>3</sup>; Galina Vladimirovna Kontsevaya<sup>3</sup>; Natalia Aleksandrovna Feofanova<sup>3</sup>; Aliya Konstantinovna Stanova<sup>3</sup>; Mikhail Pavlovich Moshkin<sup>2,3</sup>; Yuri Mikhailovich Moshkin<sup>1,3,\*</sup>

<sup>1</sup> Gene Learning Association, 1205 Geneva, Switzerland

<sup>2</sup> Department of Zoology and Animal Ecology, Tomsk State University, 634050 Tomsk, Russia

<sup>3</sup> Federal Research Center Institute of Cytology and Genetics, Siberian Branch of RAS, 630090 Novosibirsk, Russia

\* Correspondence: yury.moshkin@gmail.com

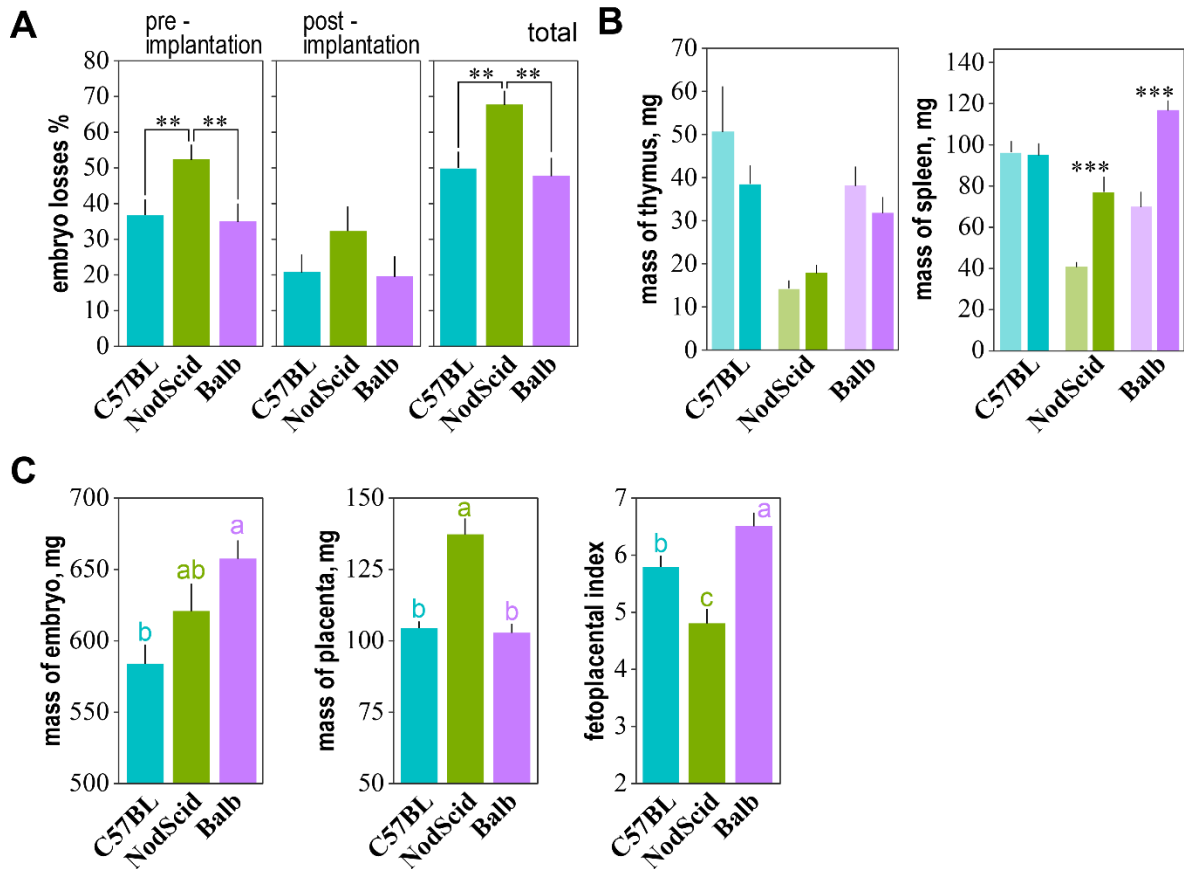

**Figure S1. Characteristics of C57BL/6J fetuses and surrogate mothers' immunocompetent organs response.**

**A)** Pre-, post-implantation, and total embryo losses in C57BL/6J, NOD-SCID, and BALB/c surrogate mothers. \*\* - Student's t-test,  $p < 0.01$ .

**B)** Females' thymus and spleen mass in non-pregnant females (light-colored bars) and in pregnant (day 16.5 of surrogate pregnancy) females (dark-colored bars). \*\*\* -  $p < 0.001$ , t-test; the number of non-pregnant/pregnant females: C57BL/6J ( $m = 3/13$ ), NOD-SCID ( $m = 5/16$ ) and BALB/c ( $m = 5/13$ ).

**C)** C57BL/6J embryo weight, placenta weight, and fetoplacental index on day 16.5 of surrogate pregnancy. Letters indicate significant statistical differences at  $p < 0.05$ , LSD-test; the number of embryos by surrogate mother group: C57BL/6J ( $n = 61$ ), NOD-SCID ( $n = 46$ ) and BALB/c ( $n = 49$ ).

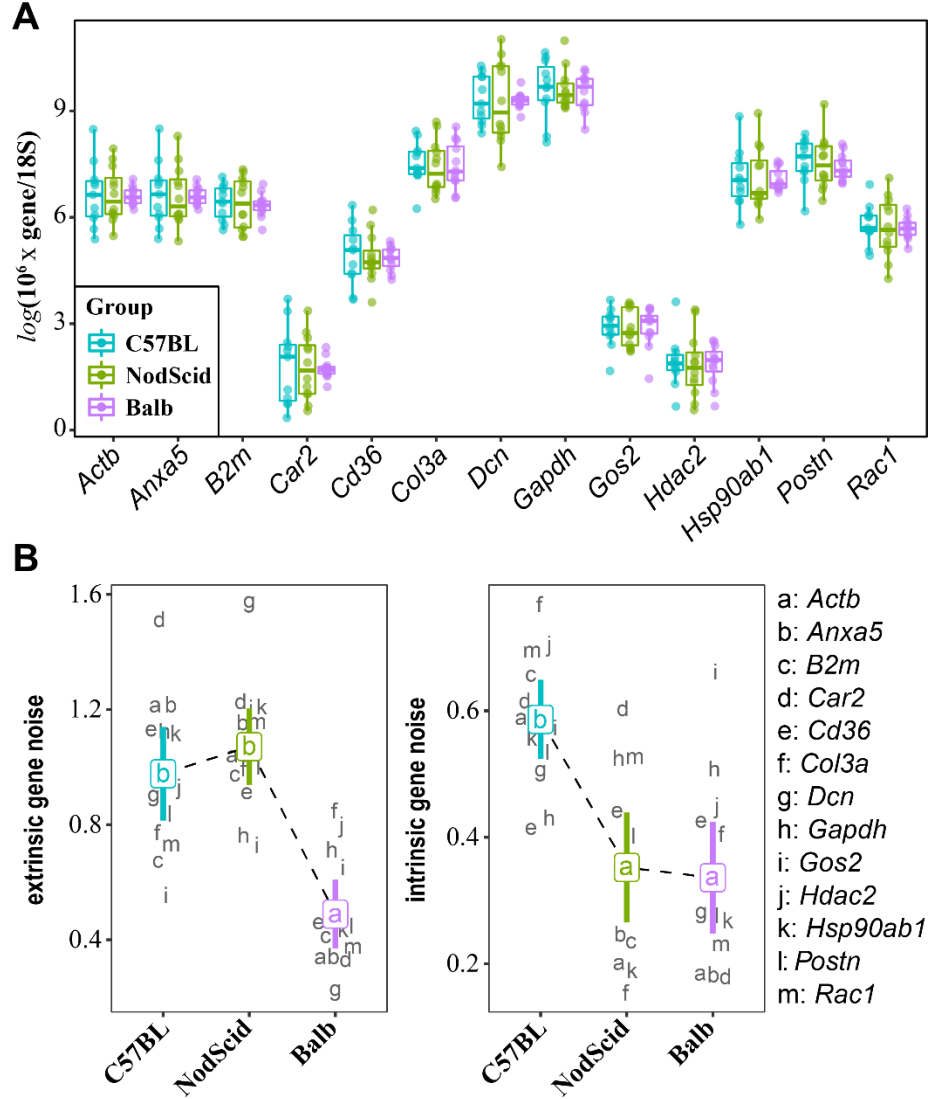

**Figure S2. The impact of mother-fetus MHC-mediated interactions on gene-wise “extrinsic”/“intrinsic” fluctuations in left/right forelimbs of C57BL/6J embryos.**

**A)** Left/right mean RT-qPCR  $\Delta Ct = \log(10^6 g/18S)$  values for each gene measured on day 16.5 of gestation in forelimbs of C57BL/6J embryos, developing in C57BL/6J, NOD-SCID, and BALB/c surrogate mothers. ANOVA and pair-wise comparisons revealed no significant differences between surrogate mother groups'  $\Delta Ct$ s of selected genes.

**B)** Estimations of “extrinsic” ( $\eta_{ext.} \approx \sqrt{2\lambda_1}$ ) and “intrinsic” ( $\eta_{int.} \approx \sqrt{2\lambda_2}$ ) gene noise for the selected genes following PCA decomposition of left/right gene expression ( $\Delta Ct$ ) matrices for each gene (eq. (9)). Colored boxes indicate means, whiskers - 95% confidence intervals, letters within mean boxes - multiple t-test comparisons with significant differences at  $FDR < 0.05$ .

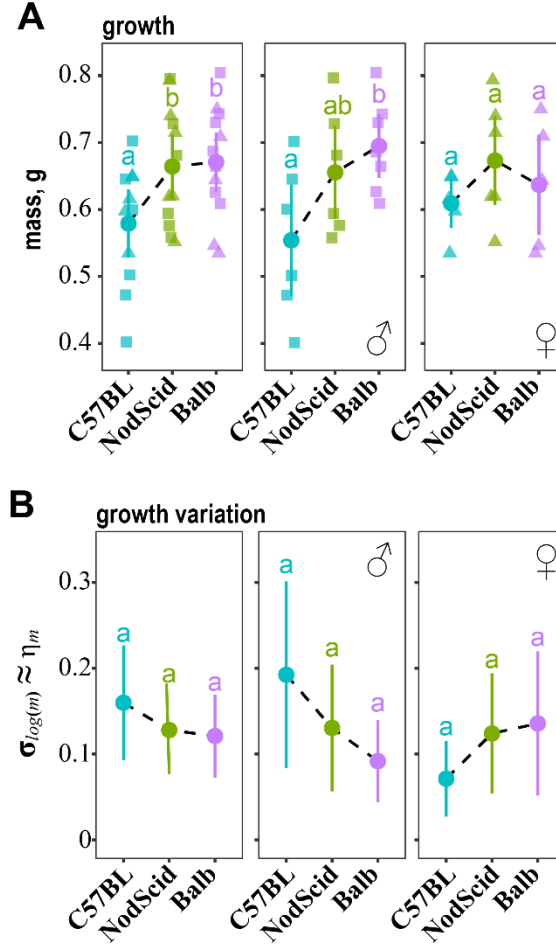

**Figure S3. The effect of surrogate mother MHC haplotype on C57BL/6J embryos mass and its fluctuation.**

**A)** Non-adjusted mass of C57BL/6J embryos developed in C57BL/6J, NOD-SCID, and BALB/c surrogate mothers; see Figure 3C.

**B)** GAMLSS estimations of  $\hat{\sigma}_{\log(m)} \approx \hat{\eta}_m$  for non-adjusted embryo mass; see Figure 3D.

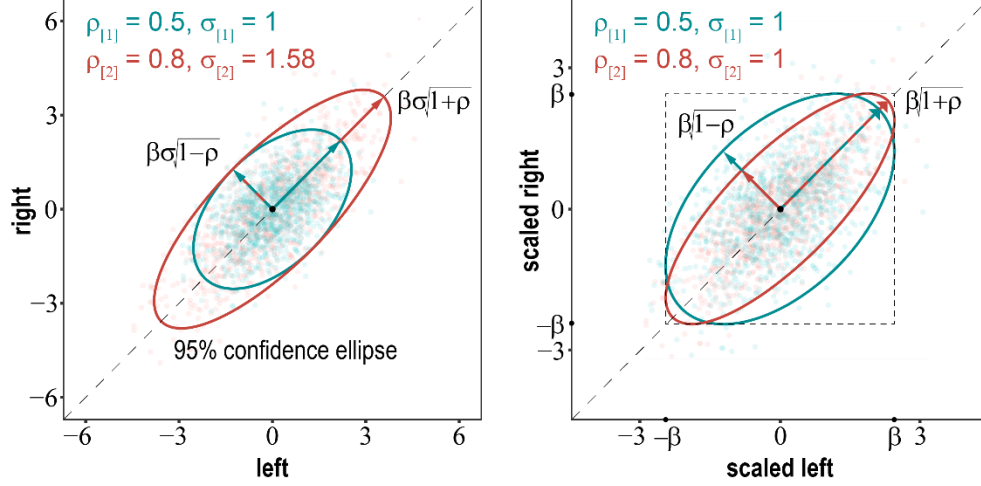

**Figure S4. Correlation is not a proper measure of the FA/”intrinsic” variability.**

To show that the correlation could be a misleading measure of the FA, let’s assume a trait  $x$  under two conditions [1] (green) and [2] (red). Under [1], the correlation between left and right  $\rho_{l,r[1]} = 0.5$ , and  $\sigma_{x[1]} = 1.0$ ; under [2],  $\rho_{l,r[2]} = 0.8$  and  $\sigma_{x[2]} = \frac{\sigma_{x[1]}\sqrt{1-\rho_{l,r[1]}}}{\sqrt{1-\rho_{l,r[2]}}} = 1.58$ .

Left panel, from the eq. (2), the “extrinsic” component of the DI of  $x_{[1]}$  is greater than that of  $x_{[2]}$ :

$$\text{Var}[E(x_{[1]}|\xi)] \approx \frac{1}{2}\sigma_{x[1]}^2(1 + \rho_{l,r[1]}) = 0.75, \text{ and } \text{Var}[E(x_{[2]}|\xi)] \approx 2.25.$$

From the eq. (3), the “intrinsic” component of the DI (FA) is equal for  $x_{[1]}$  and  $x_{[2]}$ :

$$E[\text{Var}(x_{[1]}|\xi_{[1]})] \approx \frac{1}{4}FA_{x[1]} \approx \frac{1}{2}\sigma_{x[1]}^2(1 - \rho_{l,r[1]}) = 0.25, \text{ and } E[\text{Var}(x_{[2]}|\xi_{[2]})] \approx 0.25.$$

Ellipses correspond to 95% confidence ellipses,  $\beta = \sqrt{\chi_{2,\alpha=0.05}^2} \approx 2.45$ .

Right panel, estimation of the FA using only the correlation leads to a conclusion that  $FA_{x[1]} > FA_{x[2]}$ . The such discrepancy stems from that that correlation is estimated as the covariance of standardized variables. In other words, information on the fluctuation of  $x$  ( $\sigma_x^2$ ) is dropped off. Rewriting the FA for the standardized trait  $x$ :  $FA_x \approx 2(1 - \rho_{l,r})$  (eq. (2)), it is easy to see that omitting the changes in  $\sigma_x^2$  could result in a misleading conclusion about changes in the  $FA_x$ .

**Table S1. Primers used for RT-qPCR**

| <b>Gene</b>     | <b>Description</b>                            | <b>Ensembl</b>     | <b>Forward</b>          | <b>Reverse</b>           |
|-----------------|-----------------------------------------------|--------------------|-------------------------|--------------------------|
| <i>Actb</i>     | Actin, beta                                   | ENSMUSG00000029580 | GGCTGTATTCCCCTCCATCG    | CCAGTTGGTAACAATGCCATGT   |
| <i>Anxa5</i>    | Annexin A5                                    | ENSMUSG00000027712 | ATCCTGAACCTGTTGACATCCC  | AGTCGTGAGGGCTTCATCATA    |
| <i>B2m</i>      | Beta-2 microglobulin                          | ENSMUSG00000060802 | TTCTGGTGCTTGTCTCACTGA   | CAGTATGTTTCGGCTTCCCATTCT |
| <i>Car2</i>     | Carbonic anhydrase 2                          | ENSMUSG00000027562 | CGGATGGATTGGCTGTTTTGG   | GCACGCTTCCCCTTTGTTTTTA   |
| <i>Cd36</i>     | CD36 antigen                                  | ENSMUSG00000002944 | ATGGGCTGTGATCGGAACTG    | GTCTTCCCAATAAGCATGTCTCC  |
| <i>Col3a1</i>   | Collagen, type III, alpha 1                   | ENSMUSG00000026043 | CTGTAACATGGAACTGGGGAAA  | CCATAGCTGAACTGAAAACCACC  |
| <i>Dcn</i>      | Decorin                                       | ENSMUSG00000019929 | TCTTGGGCTGGACCATTGAA    | CATCGGTAGGGGCACATAGA     |
| <i>Gapdh</i>    | Glyceraldehyde-3-phosphate dehydrogenase      | ENSMUSG00000057666 | AGGTCGGTGTGAACGGATTTG   | TGTAGACCATGTAGTTGAGGTCA  |
| <i>G0s2</i>     | G0/G1 switch gene 2                           | ENSMUSG00000009633 | AAGGAGATGATGGCGCAGAAG   | GCTGCACACCGTCTCAACTA     |
| <i>Hdac2</i>    | Histone deacetylase 2                         | ENSMUSG00000019777 | TGTGCTTGCCATCCTCGAATT   | AGCTTCCTCAACACCATCACC    |
| <i>Hsp90ab1</i> | Heat shock protein 90 alpha, class B member 1 | ENSMUSG00000023944 | TCAAACAAGGAGATTTTCCTCCG | GCTGTCCAACCTAGAAGGGTC    |
| <i>Postn</i>    | Periostin, osteoblast specific factor         | ENSMUSG00000027750 | GAGGTCTCCAAGGTCACAAAGT  | TGTGTCTCCCTGAAGCAGTCT    |
| <i>Rac1</i>     | RAS-related C3 botulinum substrate 1          | ENSMUSG00000001847 | GAGACGGAGCTGTTGGTAAAA   | ATAGGCCCAAGATTCACTGGTT   |
| <i>Rn18s</i>    | 18S ribosomal RNA                             | ENSMUSG00000119584 | CTCAACACGGGAAACCTCAC    | CGCTCCACCAACTAAGAACG     |

**Table S2. The number of implanted and live C57BL/6J embryos in experimental surrogate mother groups (mean  $\pm$  SE)**

| <b>Surrogate mother group</b> | <b>n</b> | <b>implanted embryo</b> | <b>live embryos</b> |
|-------------------------------|----------|-------------------------|---------------------|
| C57BL/6J                      | 13       | 5.92 $\pm$ 1.05         | 4.69 $\pm$ 1.01     |
| NOD-SCID                      | 16       | 4.25 $\pm$ 0.98         | 2.88 $\pm$ 0.75     |
| BALB/c                        | 13       | 4.69 $\pm$ 1.31         | 3,77 $\pm$ 1.06     |

**Table S3. GAMLSS models of the relationships between the distribution parameters (mean -  $\mu$ , dispersion -  $\sigma$ ) of logarithm-transformed embryo mass ( $\log(m)$ ) and individual estimates of pulled “intrinsic” gene noise ( $\eta_{int.}$ ) for C57BL/6J embryos**

**A) Models for  $\log(m)$**

| group              | GAMLSS model                                                        | estimate ( $\hat{\alpha}, \hat{\beta}$ ) $\pm$ s.e. | p                 |
|--------------------|---------------------------------------------------------------------|-----------------------------------------------------|-------------------|
| all <sup>(a)</sup> | (1) $\mu_{\log(m)} \sim \alpha_0 + \alpha \log(\eta_{int.})$        | <b>-0.264<math>\pm</math>0.028</b>                  | <b>&lt; 0.001</b> |
|                    | (2) $\sigma_{\log(m)} \sim \beta_0 + \beta \log(\eta_{int.})^{(b)}$ | <b>0.777<math>\pm</math>0.276</b>                   | <b>0.008</b>      |
| C57BL/6J           | (1) $\mu_{\log(m)} \sim \alpha_0 + \alpha \log(\eta_{int.})$        | <b>-0.208<math>\pm</math>0.024</b>                  | <b>&lt; 0.001</b> |
|                    | (2) $\sigma_{\log(m)} \sim \beta_0 + \beta \log(\eta_{int.})$       | <b>3.524<math>\pm</math>1.168</b>                   | <b>0.019</b>      |
| NOD-SCID           | (1) $\mu_{\log(m)} \sim \alpha_0 + \alpha \log(\eta_{int.})$        | <b>-0.255<math>\pm</math>0.054</b>                  | <b>0.002</b>      |
|                    | (2) $\sigma_{\log(m)} \sim \beta_0 + \beta \log(\eta_{int.})$       | 0.715 $\pm$ 0.594                                   | 0.263             |
| BALB/c             | (1) $\mu_{\log(m)} \sim \alpha_0 + \alpha \log(\eta_{int.})$        | <b>-0.241<math>\pm</math>0.046</b>                  | <b>0.001</b>      |
|                    | (2) $\sigma_{\log(m)} \sim \beta_0 + \beta \log(\eta_{int.})'$      | 0.877 $\pm$ 0.534                                   | 0.139             |

**B) Models for litter-size adjusted  $\log(m)$**

| group    | GAMLSS model                                                   | estimate ( $\hat{\alpha}, \hat{\beta}$ ) $\pm$ s.e. | p                 |
|----------|----------------------------------------------------------------|-----------------------------------------------------|-------------------|
| all      | (1) $\mu_{\log(m)} \sim \alpha_0 + \alpha \log(\eta_{int.})$   | <b>-0.196<math>\pm</math>0.021</b>                  | <b>&lt; 0.001</b> |
|          | (2) $\sigma_{\log(m)} \sim \beta_0 + \beta \log(\eta_{int.})'$ | <b>0.979<math>\pm</math>0.247</b>                   | <b>&lt; 0.001</b> |
| C57BL/6J | (1) $\mu_{\log(m)} \sim \alpha_0 + \alpha \log(\eta_{int.})$   | <b>-0.144<math>\pm</math>0.017</b>                  | <b>&lt; 0.001</b> |
|          | (2) $\sigma_{\log(m)} \sim \beta_0 + \beta \log(\eta_{int.})'$ | <b>3.031<math>\pm</math>0.667</b>                   | <b>0.003</b>      |
| NOD-SCID | (1) $\mu_{\log(m)} \sim \alpha_0 + \alpha \log(\eta_{int.})$   | <b>-0.24<math>\pm</math>0.039</b>                   | <b>&lt; 0.001</b> |
|          | (2) $\sigma_{\log(m)} \sim \beta_0 + \beta \log(\eta_{int.})'$ | <b>1.309<math>\pm</math>0.449</b>                   | <b>0.015</b>      |
| BALB/c   | (1) $\mu_{\log(m)} \sim \alpha_0 + \alpha \log(\eta_{int.})$   | <b>-0.103<math>\pm</math>0.021</b>                  | <b>0.001</b>      |
|          | (2) $\sigma_{\log(m)} \sim \beta_0 + \beta \log(\eta_{int.})'$ | <b>1.801<math>\pm</math>0.506</b>                   | <b>0.007</b>      |

<sup>(a)</sup> - all embryos.

<sup>(b)</sup> – Note that from the Taylor expansion for the moments  $\sigma_{\log(m)} \approx \frac{\mu_m}{\sigma_m} = \eta_m$ . Assuming a normal distribution of  $\log(m)$ :  $\sigma_{\log(m)} = \sqrt{\log(1 + \eta_m^2)}$ , and for  $\eta_m^2 < 1$ ,  $\sigma_{\log(m)} \approx \eta_m$ .



**Table S4. GAMLSS models of the relationships between the distribution parameters ( $\mu$ ,  $\sigma$ ) of  $\log(PLGF)$  (PLGF concentrations, ng/l) and individual estimates of pulled “intrinsic” gene noise ( $\eta_{int.}$ ) for C57BL/6J embryos**

| group    | GAMLSS model                                                     | estimate ( $\hat{\alpha}, \hat{\beta}$ ) $\pm$ s.e. | p                 |
|----------|------------------------------------------------------------------|-----------------------------------------------------|-------------------|
| all      | (1) $\mu_{\log(PLGF)} \sim \alpha_0 + \alpha \log(\eta_{int.})$  | <b>-0.551<math>\pm</math>0.081</b>                  | <b>&lt; 0.001</b> |
|          | (2) $\sigma_{\log(PLGF)} \sim \beta_0 + \beta \log(\eta_{int.})$ | <b>1.424<math>\pm</math>0.314</b>                   | <b>&lt; 0.001</b> |
| C57BL/6J | (1) $\mu_{\log(PLGF)} \sim \alpha_0 + \alpha \log(\eta_{int.})$  | <b>-0.555<math>\pm</math>0.092</b>                  | <b>0.001</b>      |
|          | (2) $\sigma_{\log(PLGF)} \sim \beta_0 + \beta \log(\eta_{int.})$ | 1.823 $\pm$ 0.896                                   | 0.081             |
| NOD-SCID | (1) $\mu_{\log(PLGF)} \sim \alpha_0 + \alpha \log(\eta_{int.})$  | <b>-0.524<math>\pm</math>0.105</b>                  | <b>0.001</b>      |
|          | (2) $\sigma_{\log(PLGF)} \sim \beta_0 + \beta \log(\eta_{int.})$ | <b>2.338<math>\pm</math>0.555</b>                   | <b>0.003</b>      |
| BALB/c   | (1) $\mu_{\log(PLGF)} \sim \alpha_0 + \alpha \log(\eta_{int.})$  | <b>-0.353<math>\pm</math>0.089</b>                  | <b>0.004</b>      |
|          | (2) $\sigma_{\log(PLGF)} \sim \beta_0 + \beta \log(\eta_{int.})$ | 0.372 $\pm$ 0.53                                    | 0.502             |
